# Supplementary material for: Arbuscular mycorrhizal fungi reduce nitrous oxide emissions from N2O hotspots
Source: PubMed Central journal article supplement (PMC6282961; doi:10.1111/nph.14931), 2017-12-05
Supplement: NPH-220-1285-s001.pdf [file NPH-220-1285-s001.pdf]

## New Phytologist Supporting Information

Article title: **Arbuscular mycorrhizal fungi reduce nitrous oxide emissions from N<sub>2</sub>O hotspots**

Authors: Kate Storer, Aisha Coggan, Phil Ineson, Angela Hodge

Article acceptance date: 26<sup>th</sup> October 2017.

The following Supporting Information is available for this article:

**Table S1.** Mean plant biomass parameters from AMF and non-AMF treatments in Experiment 1 ± standard error of the mean ( $n = 12$ ). There were no significant differences between treatments for any of the parameters ( $P > 0.05$  in each case) as determined using two-way ANOVAs.

|                    | AMF                      | Non-AMF                   |
|--------------------|--------------------------|---------------------------|
| Leaf DW (g)        | 1.22 <sup>a</sup> ± 0.05 | 1.16 <sup>a</sup> ± 0.07  |
| Stalk DW (g)       | 2.08 <sup>b</sup> ± 0.08 | 1.97 <sup>b</sup> ± 0.11  |
| Tassel DW (g)      | 0.03 <sup>c</sup> ± 0.01 | 0.02 <sup>c</sup> ± 0.003 |
| Total shoot DW (g) | 3.89 <sup>d</sup> ± 0.32 | 3.82 <sup>d</sup> ± 0.33  |
| Root DW (g)        | 1.24 <sup>e</sup> ± 0.29 | 1.68 <sup>e</sup> ± 0.45  |
| Total plant DW (g) | 5.13 <sup>f</sup> ± 0.41 | 5.50 <sup>f</sup> ± 0.57  |
| Root weight ratio  | 0.23 <sup>g</sup> ± 0.03 | 0.27 <sup>g</sup> ± 0.05  |

Mean values with the same letters are not significantly different at  $P = 0.05$ .
